# Supplementary material
Source: publisher site journal article supplement (http://static.cambridge.org/content/id/urn:cambridge.org:id:article:S2059866119003893/resource/name/S2059866119003893supp001.docx)

**Online Supplement: Survey Instrument**


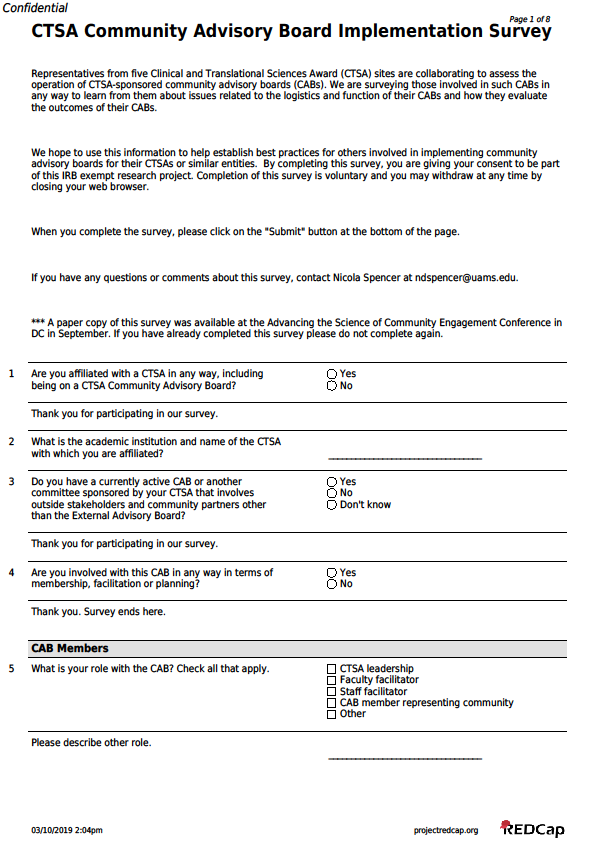

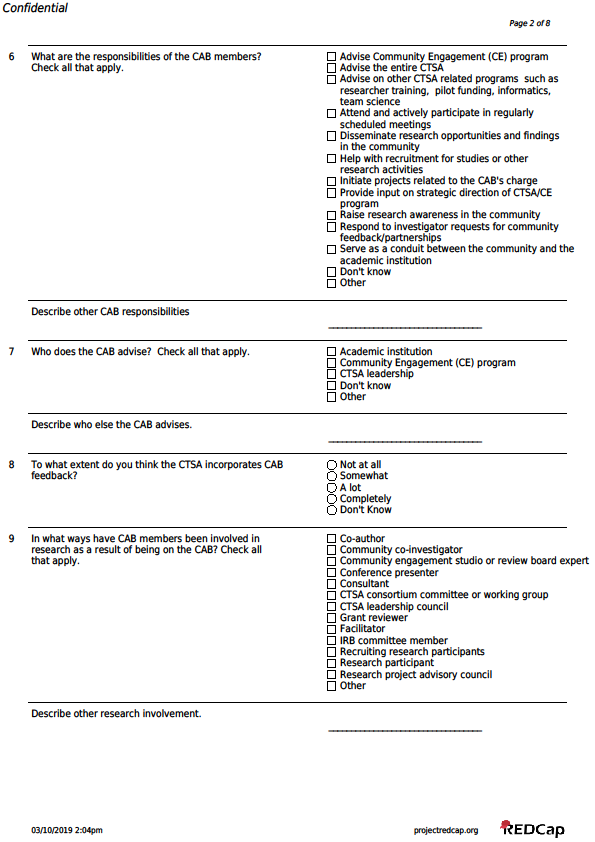

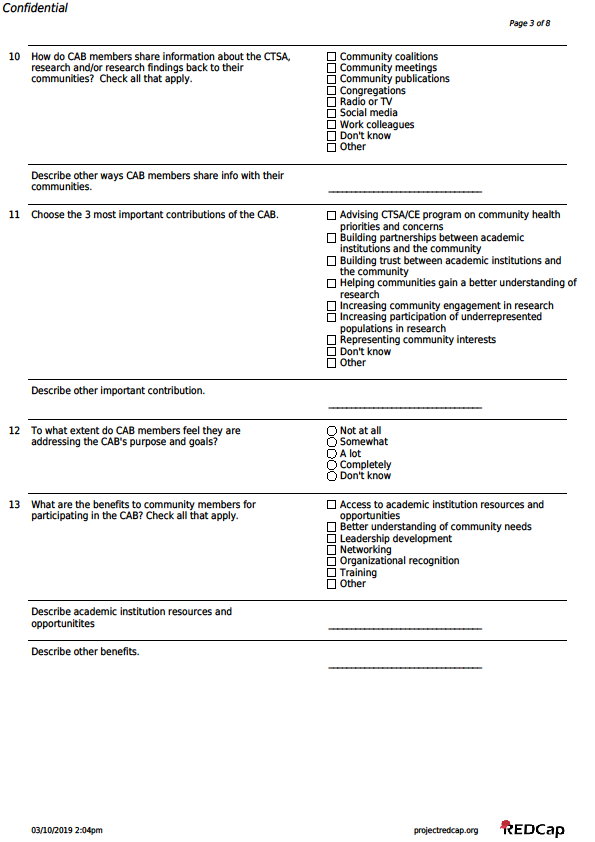

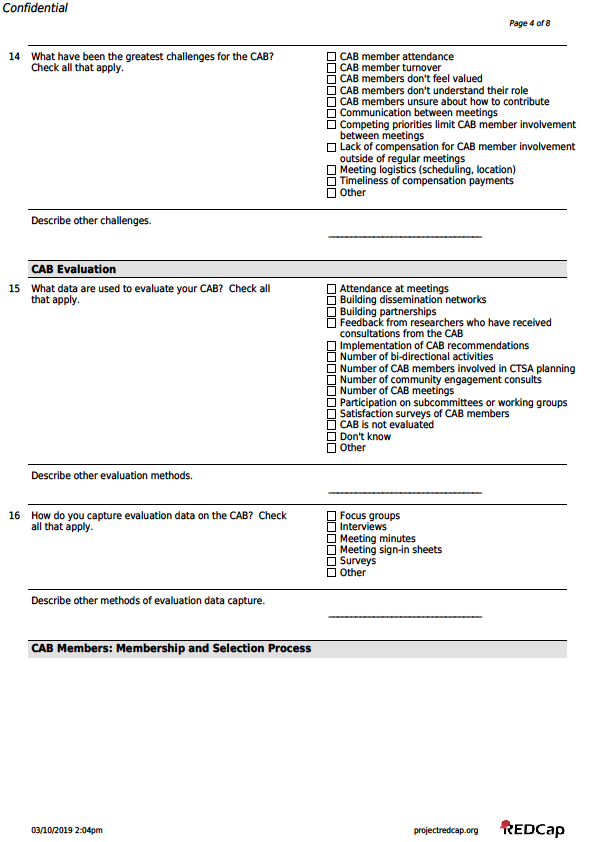

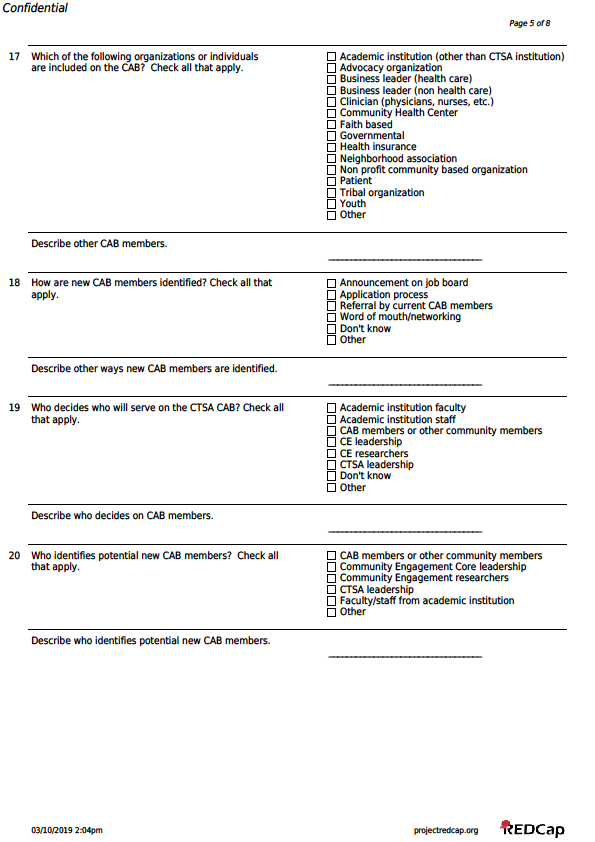

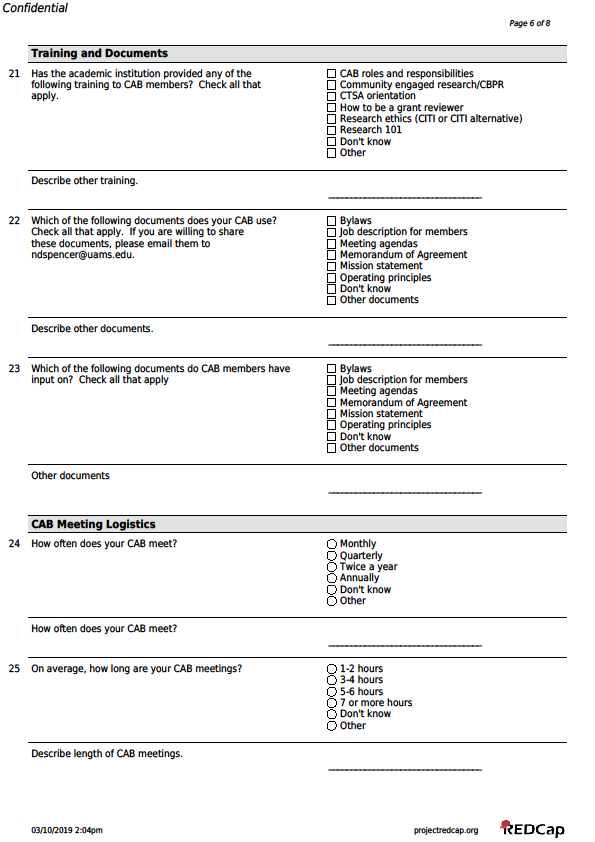

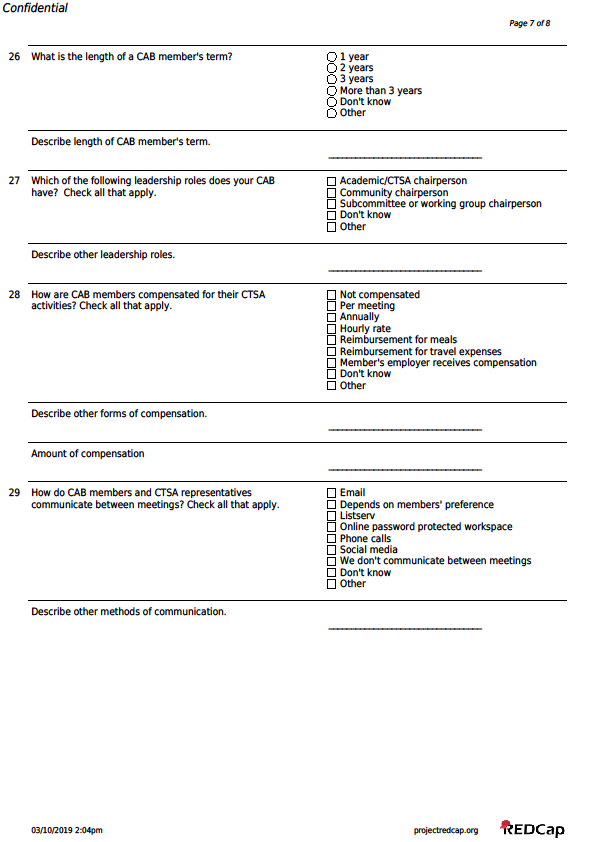

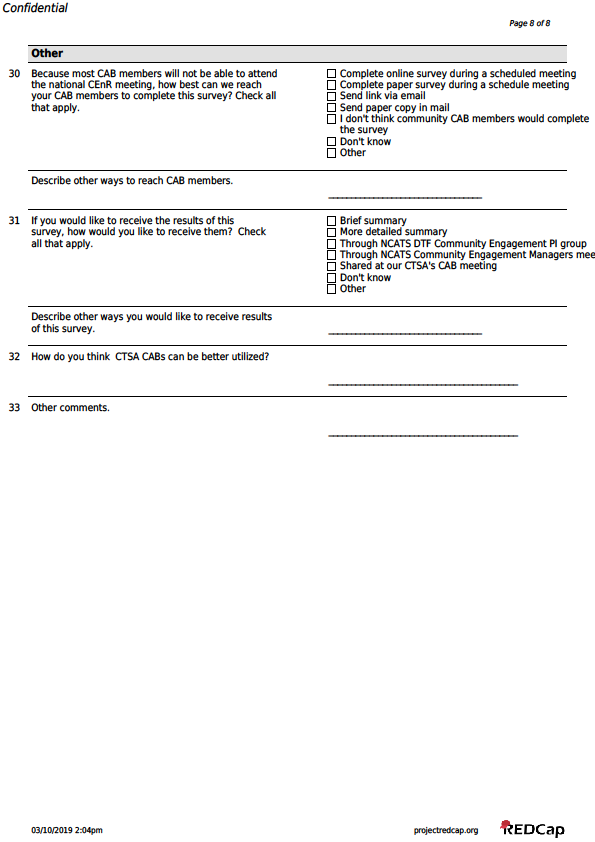

Supplement: Supplementary file 1 [file S2059866119003893supp001.docx]
